# Supplementary material
Source: HighWire-hosted journal article supplement (https://bmjopen.bmj.com/content/8/5/e019721)
Supplement: inline-supplementary-material-1 [file inline-supplementary-material-1.pdf]

Supplemental Figure S1: PREG Study Flow Chart

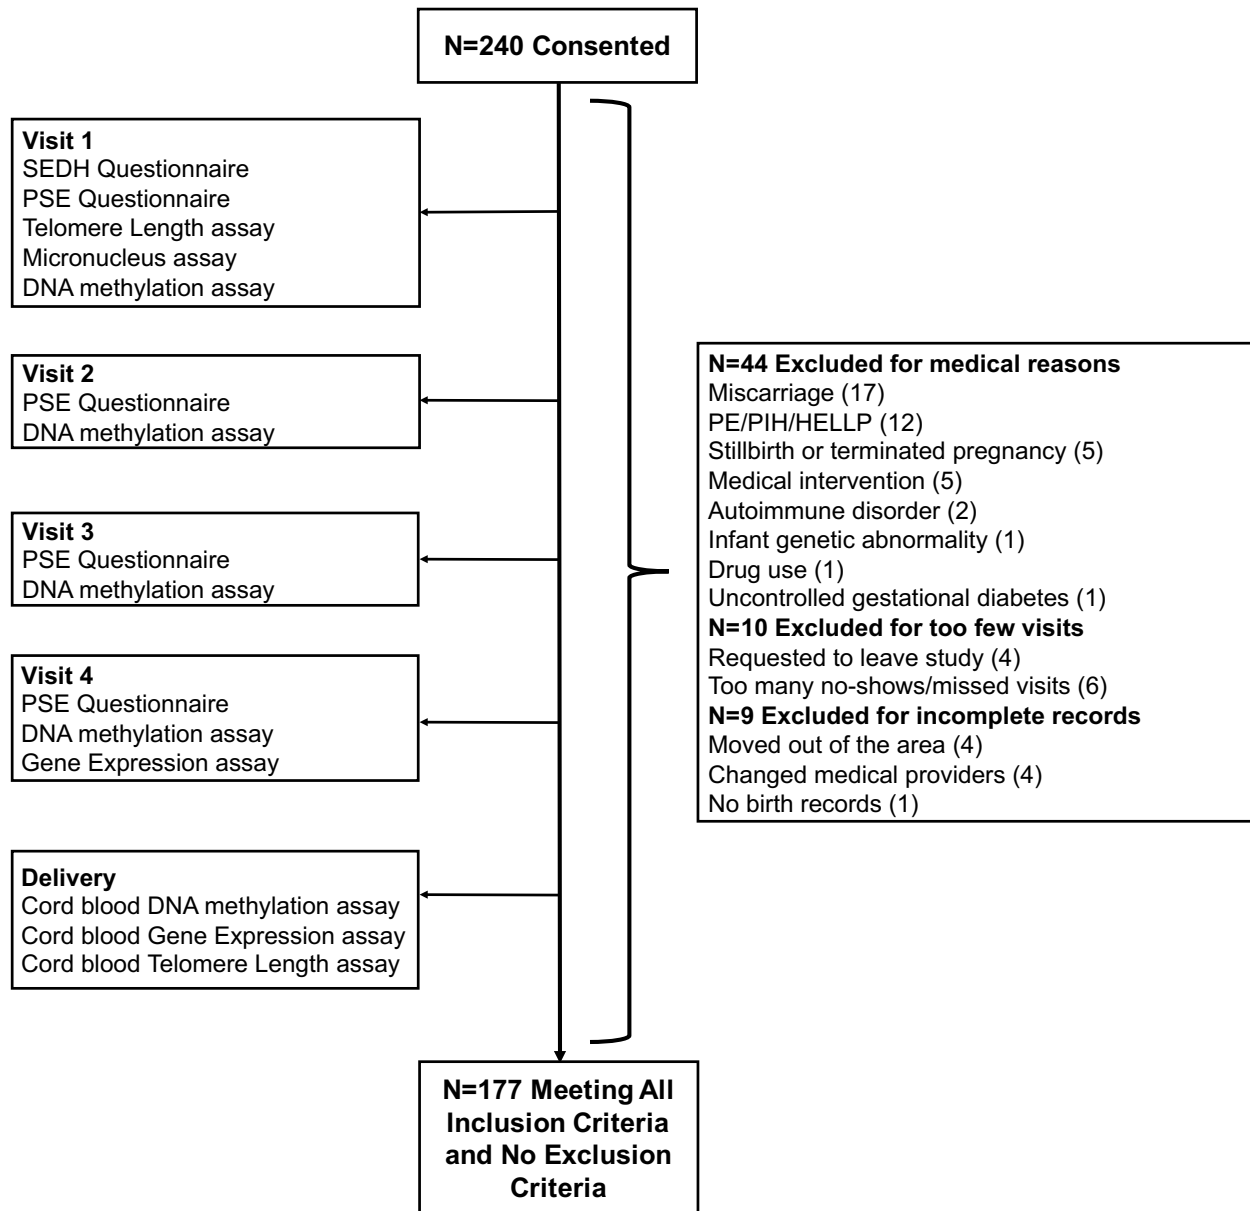

SEDH=social and environmental determinants of health; PSE=pregnancy-specific environment; PE=preeclampsia; PIH=pregnancy-induced hypertension; HELLP=hemolysis, elevated liver enzymes, low platelet count.
